# Supplementary material for: Temperature-Dependent Variations in Sulfate-Reducing Communities Associated with a Terrestrial Hydrocarbon Seep
Source: PubMed Central journal article supplement (PMC4262361; doi:10.1264/jsme2.me14086), 2014-10-02
Supplement: 29_377_s1.pdf [file 29_377_s1.pdf]

## Supplementary Figures

**Fig. S1** Bayesian trees showing phylogenetic affiliations of 16S rRNA genes detected in unincubated and incubated KTLS sediment samples belonging to (a) *Thermus*, *Thermodesulfobacteria*, *Thermotogae*, *Dictyoglomi*, *Aquificae*, JS1, OP5, OP9 and OP11, (b) *Cyanobacteria*, *Verrucomicrobia*, *Acidobacteria*, *Planctomycetes*, *Actinobacteria*, *Chloroflexi*, *Deferribacteres*, *Spirochaetes*, *Bacteroides* and *Nitrospirae*, (c) *Firmicutes*, (d) *Proteobacteria* and (e) archaea. The detected sequences were labeled in boldface with the fraction of each in relation to the total screened clones in an individual library. The “unm” and digits starting from the fourth characters of the sequence name represent unincubated sediments and incubation temperature, respectively. Supporting values for branch nodes below 0.5 are not shown. The number attached with the referenced bar represents the substitutions per sequence position

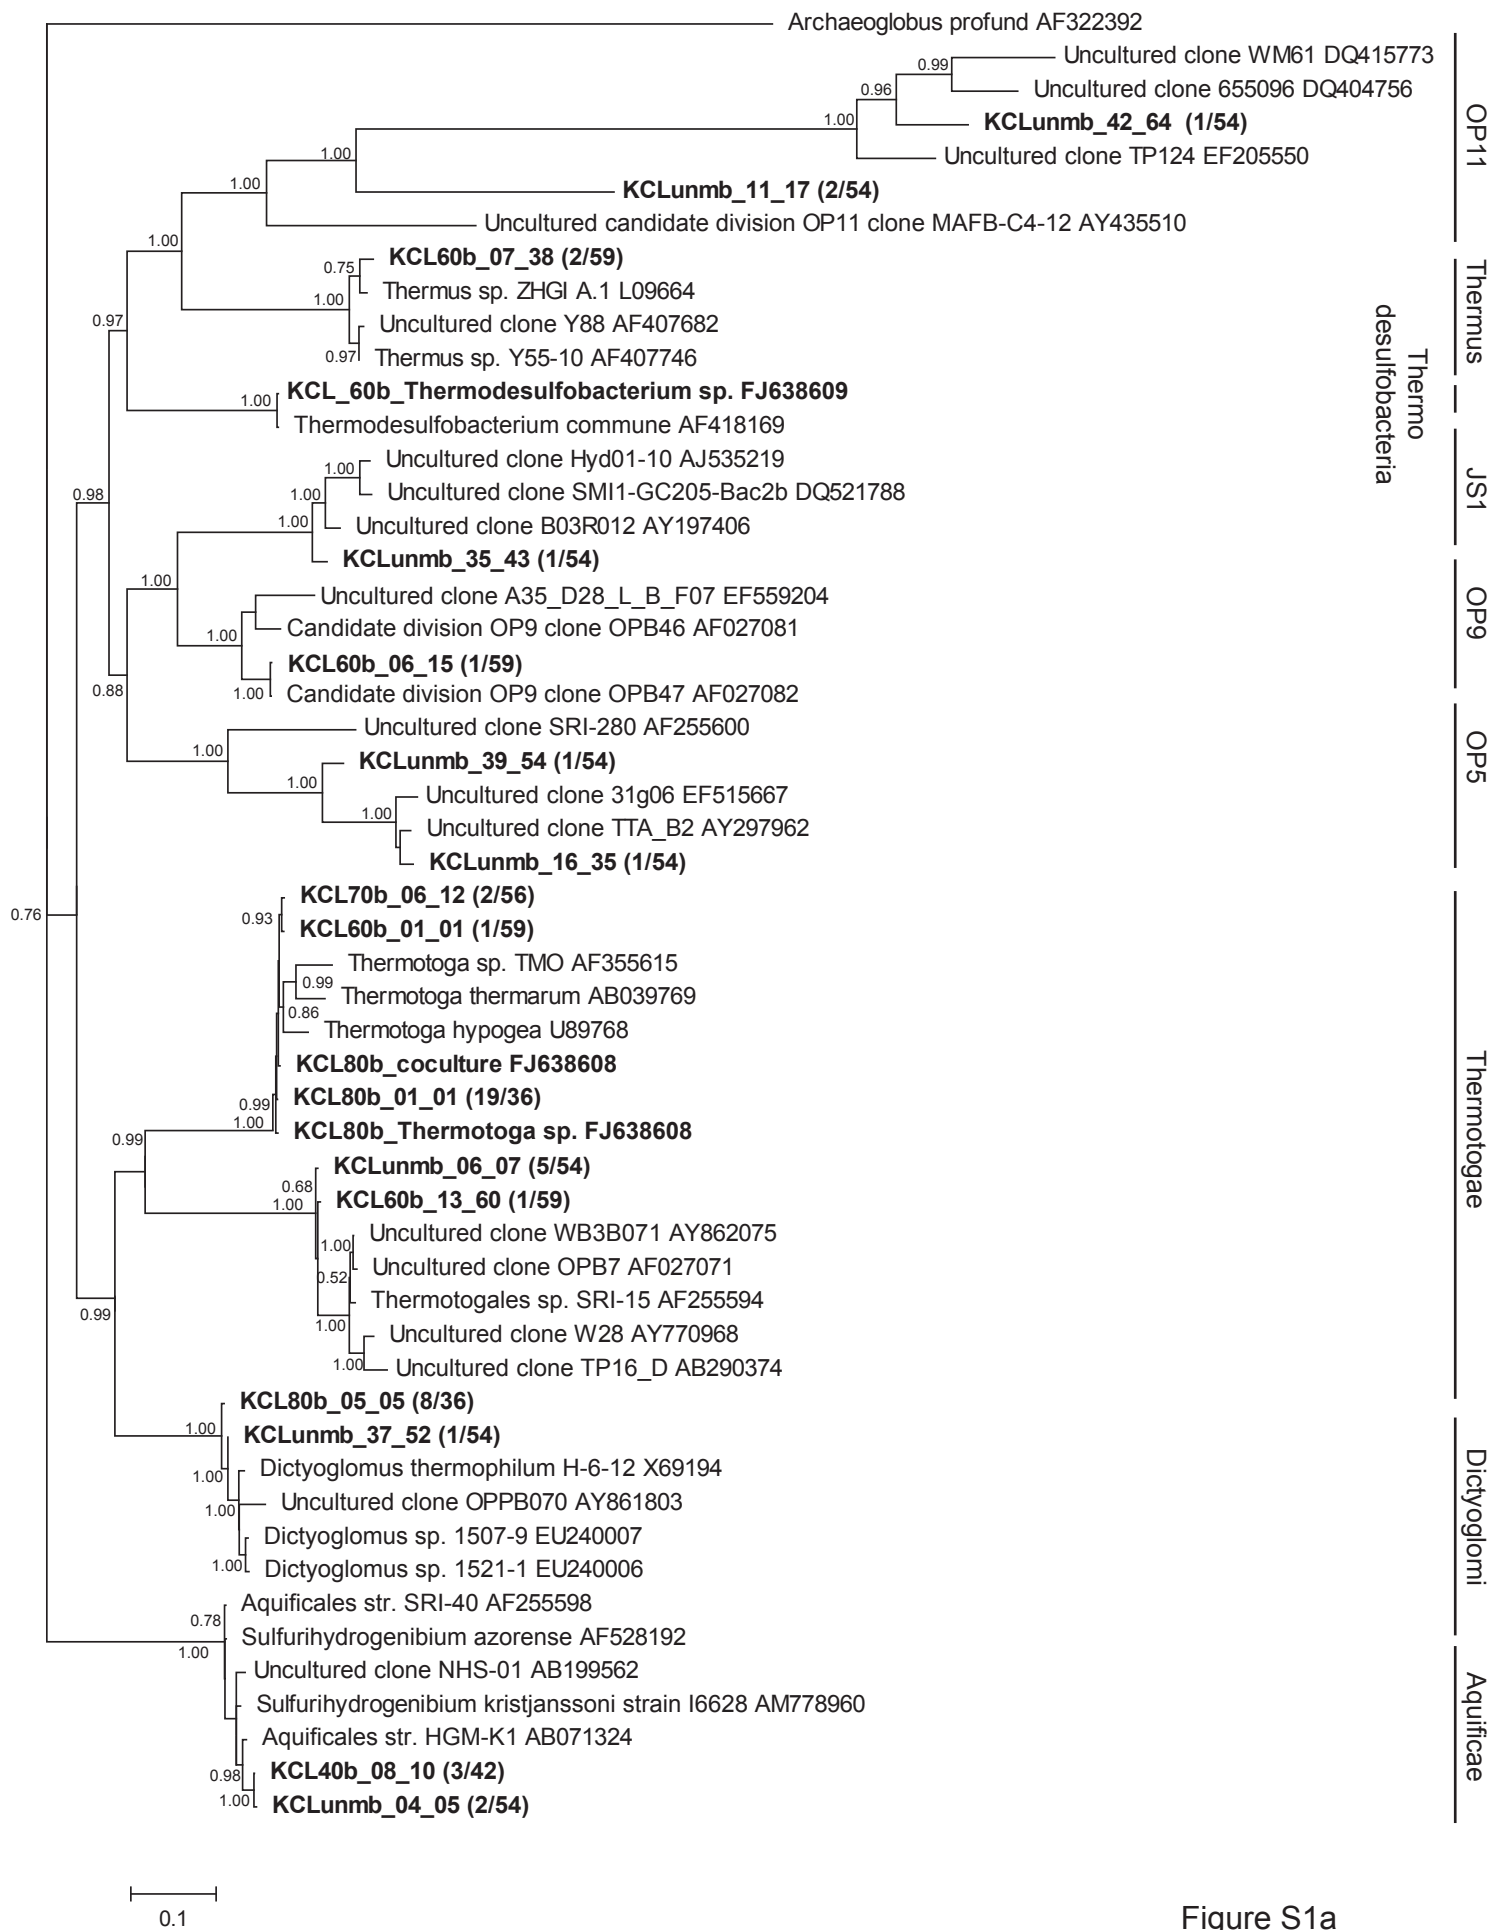

Figure S1a

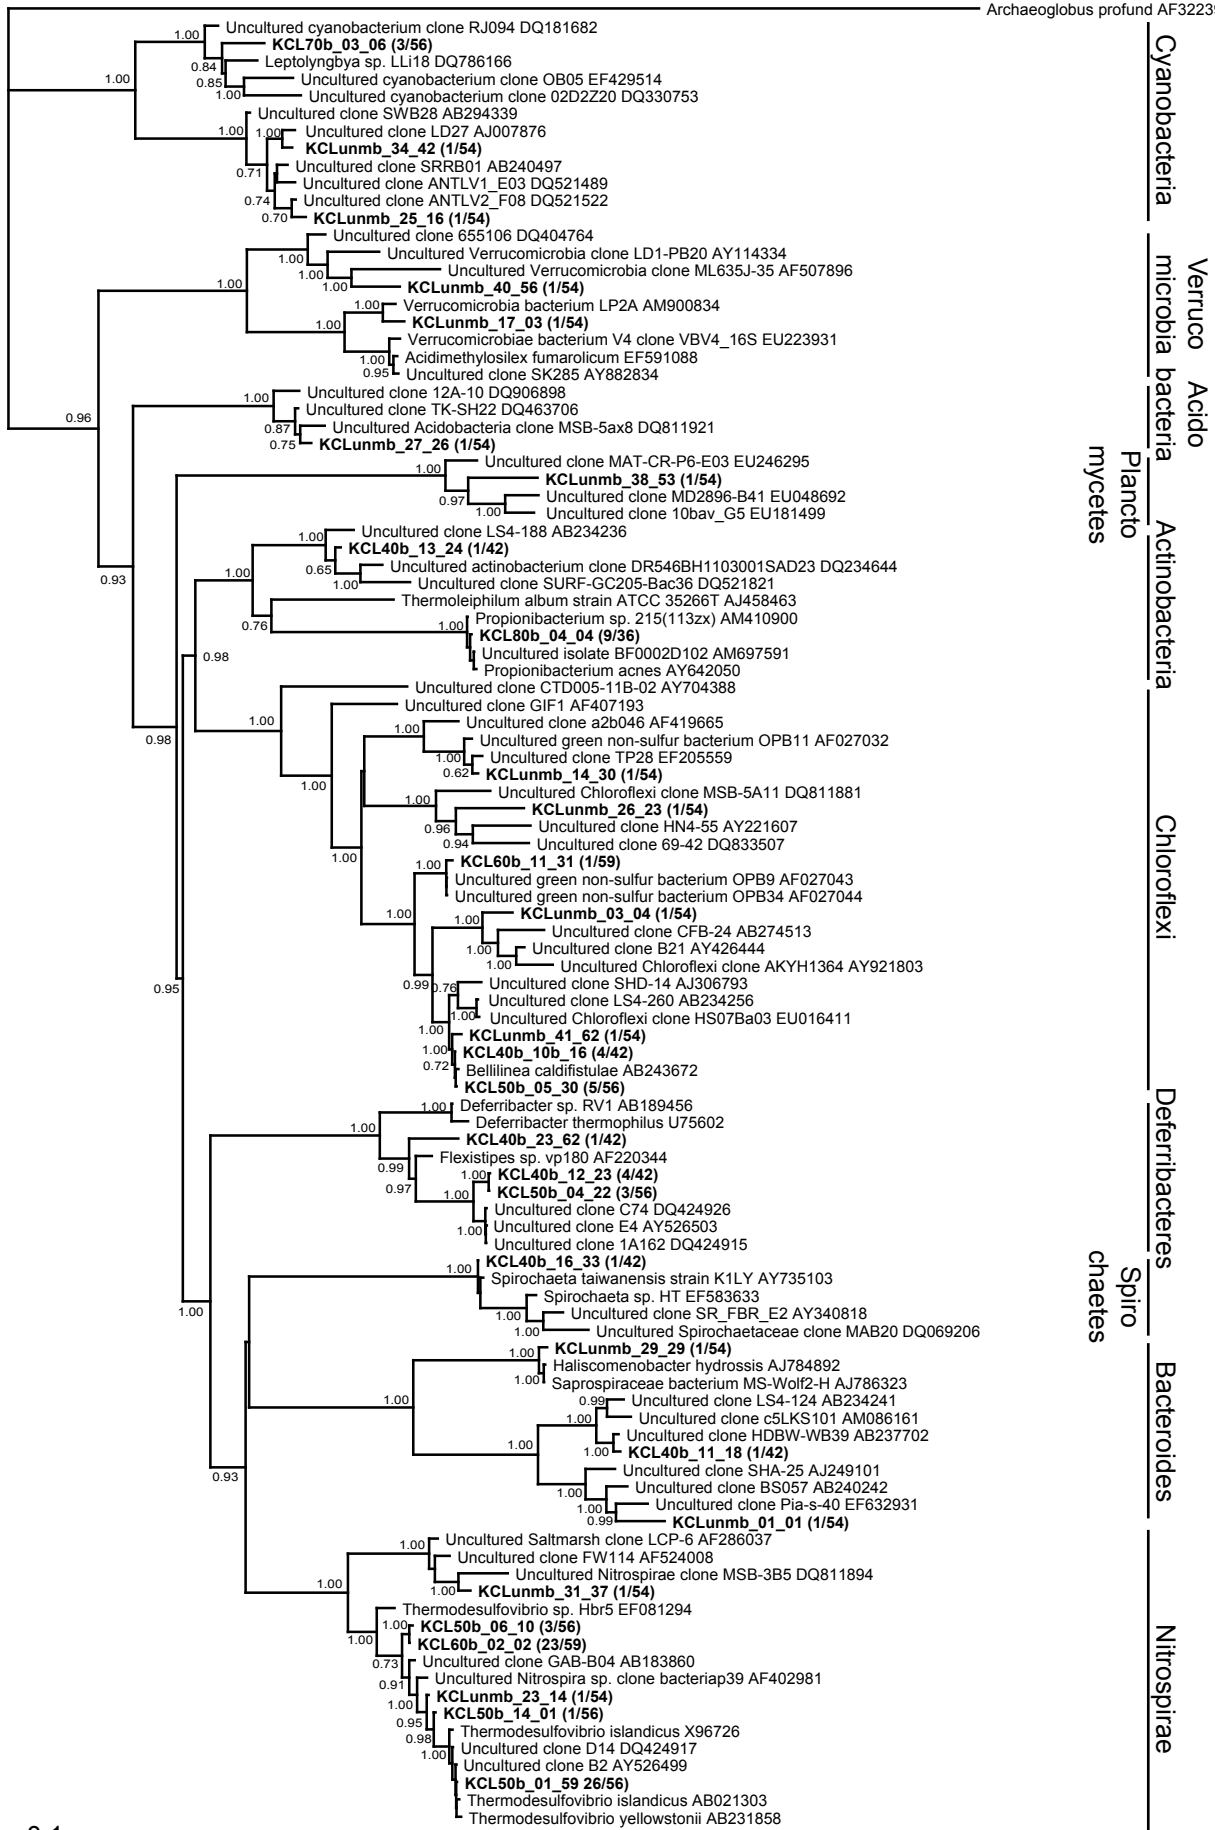

Figure S1b

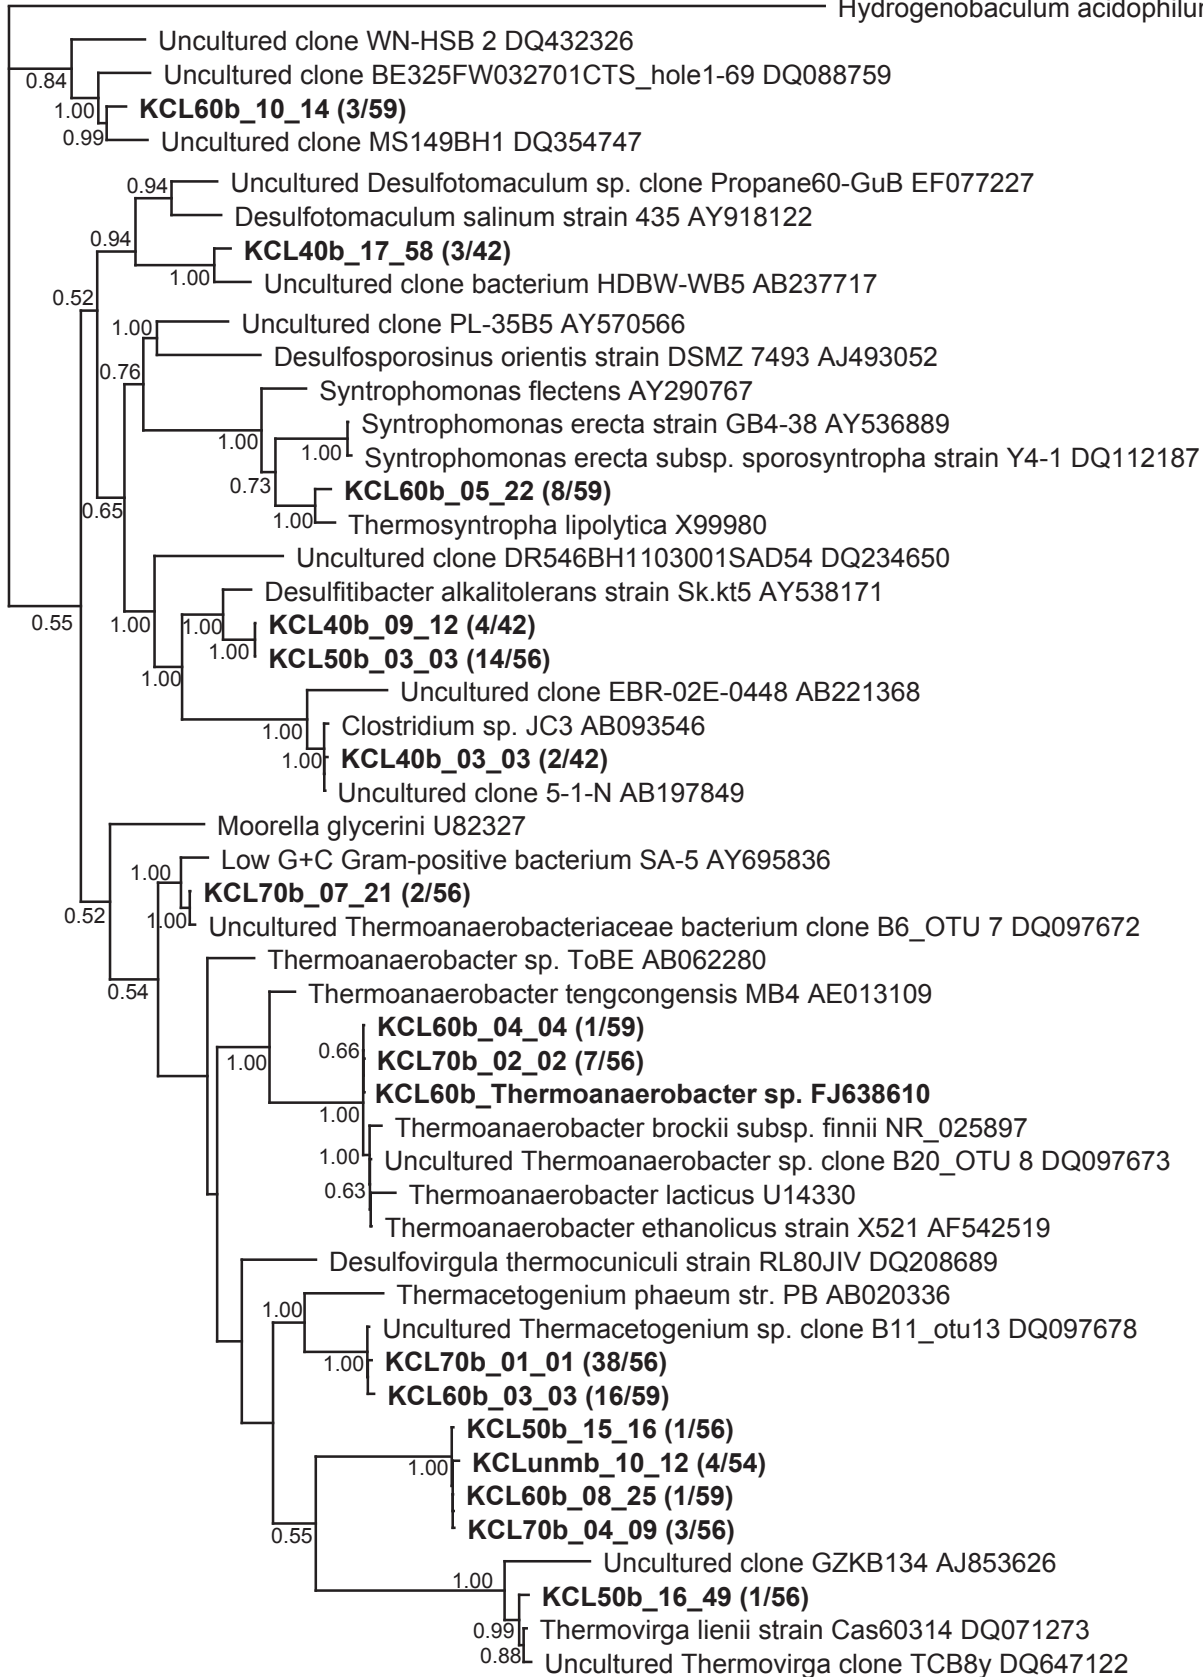

Firmicutes

0.1

Figure S1c

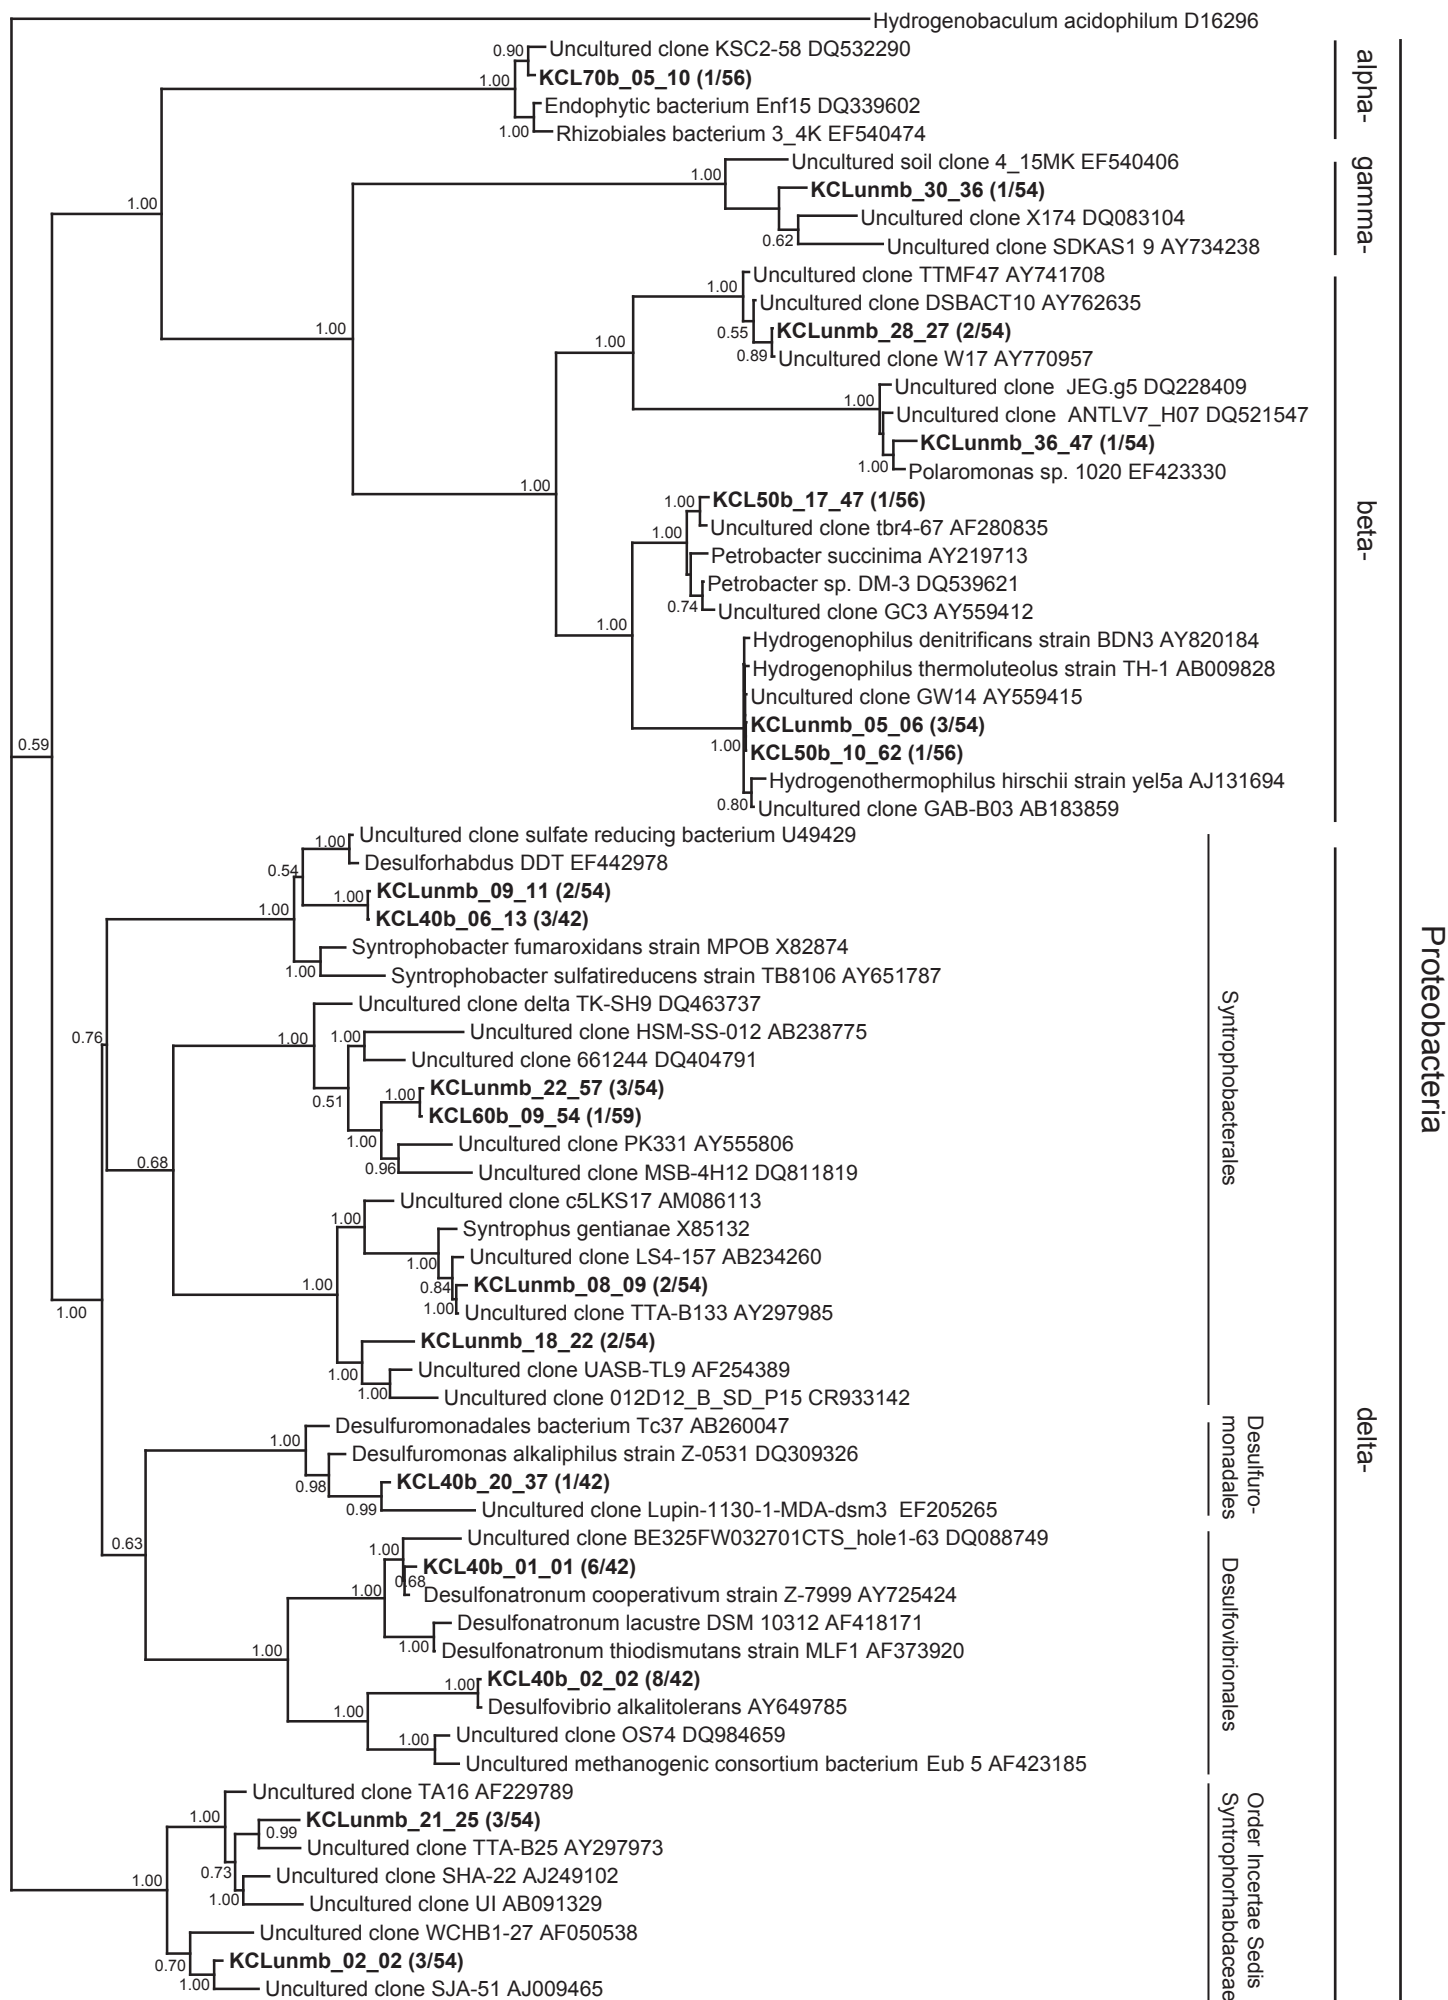

Figure S1d
